# Supplementary material
Source: Springer Nature journal article supplement (https://www.springermedizin.de/resource/supplementary/13023_2009_180_MOESM5_ESM.pdf/9641802)

Technetium 99 scan

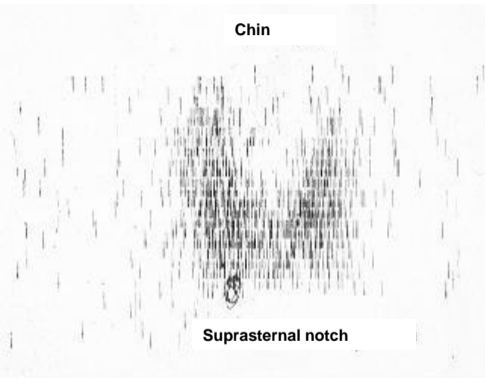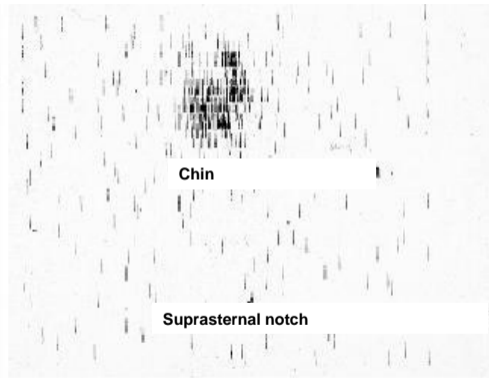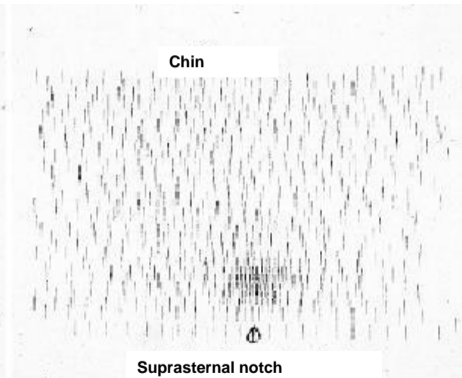

Supplement: MOESM5 [file 9641802]
